# Supplementary material for: Flood exposure decreases the likelihood of receiving formal education: evidence from 34 countries
Source: Research Square preprint supplement (doi:10.21203/rs.3.rs-8563764/v1), 2026-01-21
Supplement: Supplementary file 1 [file 2f88be7fe9f3aeab3a5503e7.pdf]

## Supplemental Figures & Tables

**Table S1:** Surveys included in the analysis by country

| Country          | Surveys            | Sample  |
|------------------|--------------------|---------|
| Angola           | AO7                | 18400   |
| Bangladesh       | BD5, BD6, BD7, BD8 | 104029  |
| Burkina Faso     | BF6, BF8           | 42578   |
| Benin            | BJ6, BJ7           | 38660   |
| Burundi          | BU6, BU7           | 29194   |
| Congo - Kinshasa | CD5, CD6           | 24854   |
| Côte d'Ivoire    | CI6, CI8           | 31403   |
| Cameroon         | CM6, CM7           | 30286   |
| Ethiopia         | ET4, ET6, ET7      | 50416   |
| Ghana            | GH5, GH6, GH8      | 38010   |
| Gambia           | GM7                | 18051   |
| Guinea           | GN4, GN6, GN7      | 25002   |
| Haiti            | HT5, HT6, HT7      | 30826   |
| India            | IA6, IA7           | 1469182 |
| Kenya            | KE5, KE6, KE8      | 103550  |
| Cambodia         | KH5, KH6, KH8      | 53008   |
| Liberia          | LB5, LB6, LB7      | 25675   |
| Madagascar       | MD5, MD7           | 44965   |
| Mali             | ML5, ML6, ML7      | 31483   |
| Myanmar (Burma)  | MM7                | 11849   |
| Mauritania       | MR7                | 24192   |
| Mozambique       | MZ6, MZ8           | 36600   |
| Nigeria          | NG5, NG6, NG7      | 102076  |
| Niger            | NI6                | 12507   |
| Namibia          | NM5, NM6           | 10956   |
| Nepal            | NP5, NP6, NP7, NP8 | 43111   |
| Pakistan         | PK5, PK7           | 29309   |
| Sierra Leone     | SL5, SL6, SL7      | 43233   |
| Senegal          | SN4, SN6, SN7, SN8 | 121845  |
| Chad             | TD6                | 25669   |
| Togo             | TG6                | 10253   |
| Tanzania         | TZ5, TZ7, TZ8      | 50416   |
| Uganda           | UG5, UG6, UG7      | 36726   |
| Zambia           | ZM5, ZM6, ZM7      | 44536   |

**Table S2:** Characteristics of exposed and unexposed samples

| <b>Characteristic</b>         | <b>Not Flooded</b> | <b>Flooded</b> |
|-------------------------------|--------------------|----------------|
| Sample Size                   | 1794182            | 1018668        |
| Mean Age                      | 15.5               | 15.9           |
| Mean Years of Education       | 6                  | 7              |
| <b>Sex</b>                    |                    |                |
| Male                          | 892763 (49.8%)     | 504013 (49.5%) |
| Female                        | 901389 (50.2%)     | 514631 (50.5%) |
| <b>Place of Residence</b>     |                    |                |
| Urban                         | 521337 (29.1%)     | 312812 (30.7%) |
| Rural                         | 1272845 (70.9%)    | 705856 (69.3%) |
| <b>Educational Attainment</b> |                    |                |
| No Education                  | 223890 (12.5%)     | 66639 (6.5%)   |
| Incomplete primary            | 576715 (32.2%)     | 224206 (22%)   |
| Completed Primary             | 146493 (8.2%)      | 91676 (9%)     |
| Incomplete secondary          | 645536 (36%)       | 488613 (48%)   |
| Completed Secondary           | 104338 (5.8%)      | 72437 (7.1%)   |
| Higher Education              | 94019 (5.2%)       | 73922 (7.3%)   |
| <b>Wealth Quintile</b>        |                    |                |
| Poorest Quintile              | 405580 (22.6%)     | 234460 (23%)   |
| Poorer Quintile               | 388661 (21.7%)     | 230241 (22.6%) |
| Middle Quintile               | 379614 (21.2%)     | 199132 (19.5%) |
| Richer Quintile               | 338526 (18.9%)     | 179877 (17.7%) |
| Richest Quintile              | 281801 (15.7%)     | 174958 (17.2%) |

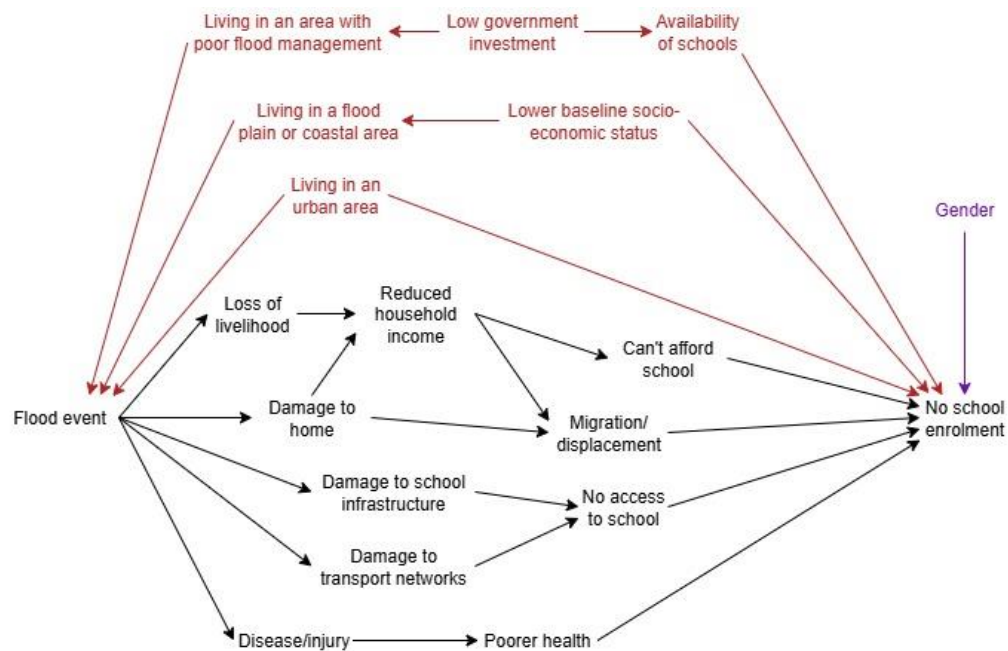

**Figure S1:** DAG showing hypothesised causal pathways from flood events to no school enrolment (black), as well as potential sources of bias (red), and effect measure modifiers (purple)

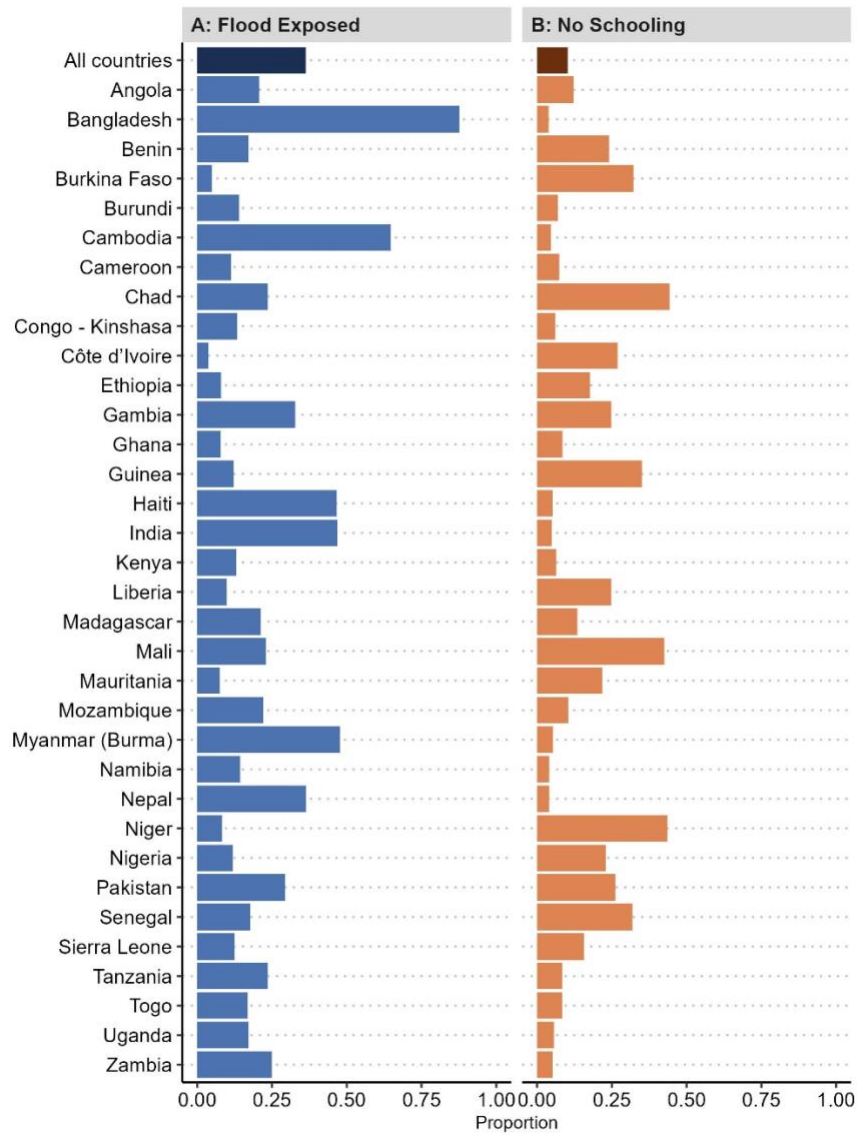

**Figure S2:** (A) Proportion of sample exposed to flooding at ages 5 and 6. (B) Proportion of sample with no formal education, by country.

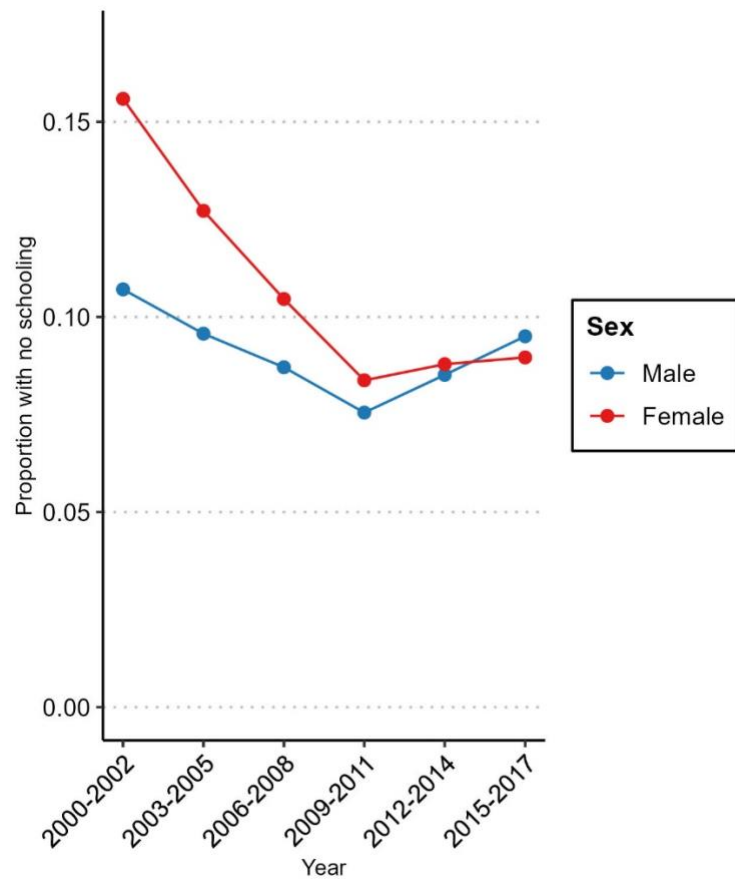

**Figure S3:** Proportion of sample with no formal education over time, by sex.

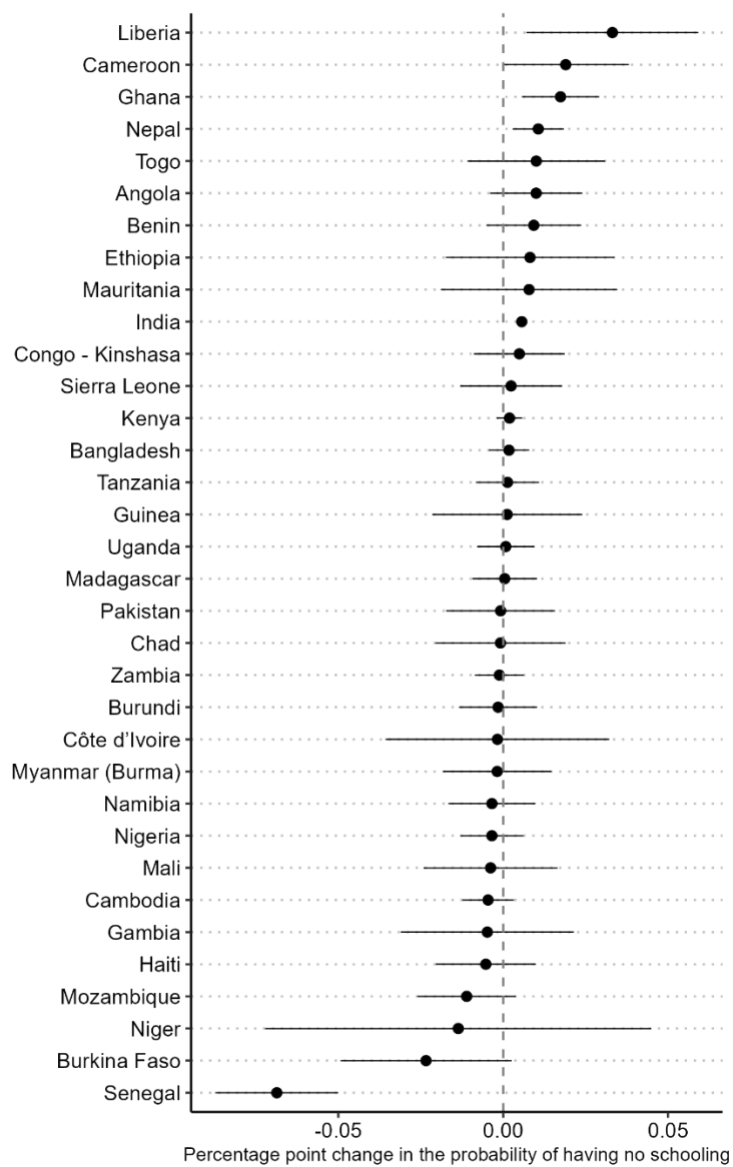

**Figure S4:** Effect of flooding on the likelihood of having no formal education, by country.

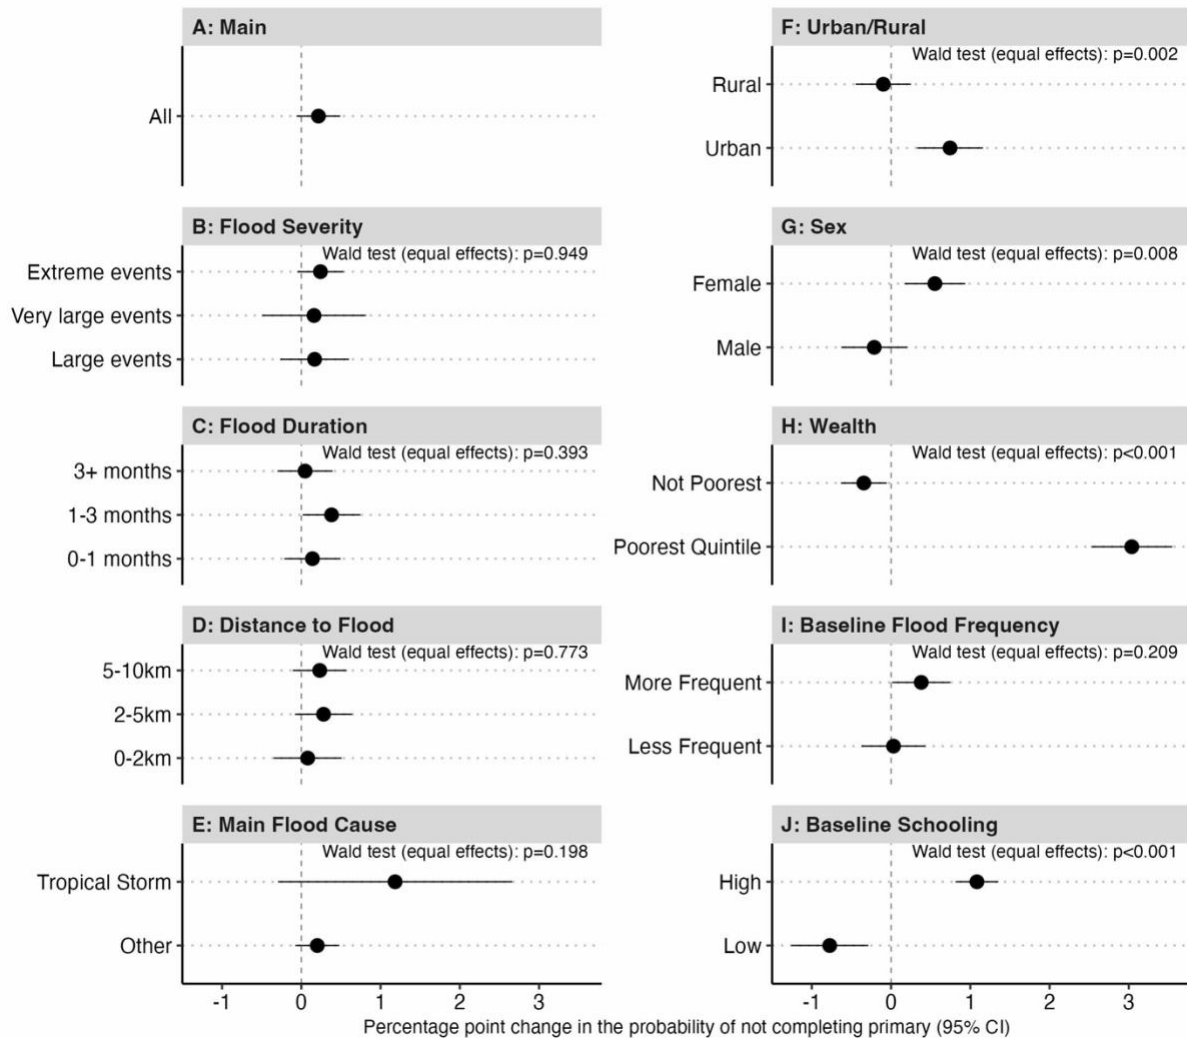

**Figure S5:** Effect of exposure to flooding at ages 5-6 on the likelihood of not completing primary education across flood- and vulnerability-related factors. (A) Average effect across the entire sample. (B) Effect of floods classified as “large” (5–15-year recurrence interval), “very large” (15–100-year recurrence), and “extreme” (>100-year recurrence). (C) and (D) show the effects by flood duration and by distance from the cluster to the flood boundary, respectively. (E) Effect of floods associated with tropical storms versus other causes (e.g., monsoonal rain, snowmelt). (F) and (G) show the effects by rural/urban status and sex, respectively. (H) Effect among those living in the poorest wealth quintile (as defined in the DHS, by country). (I) Effect among clusters experiencing more than the median number of floods (median=5) versus fewer over the study period. (J) Effect among clusters with above- versus below-median rates of any formal education (median=0.96). Panels B–J report p-values from Wald tests assessing equality of effects across subgroups.

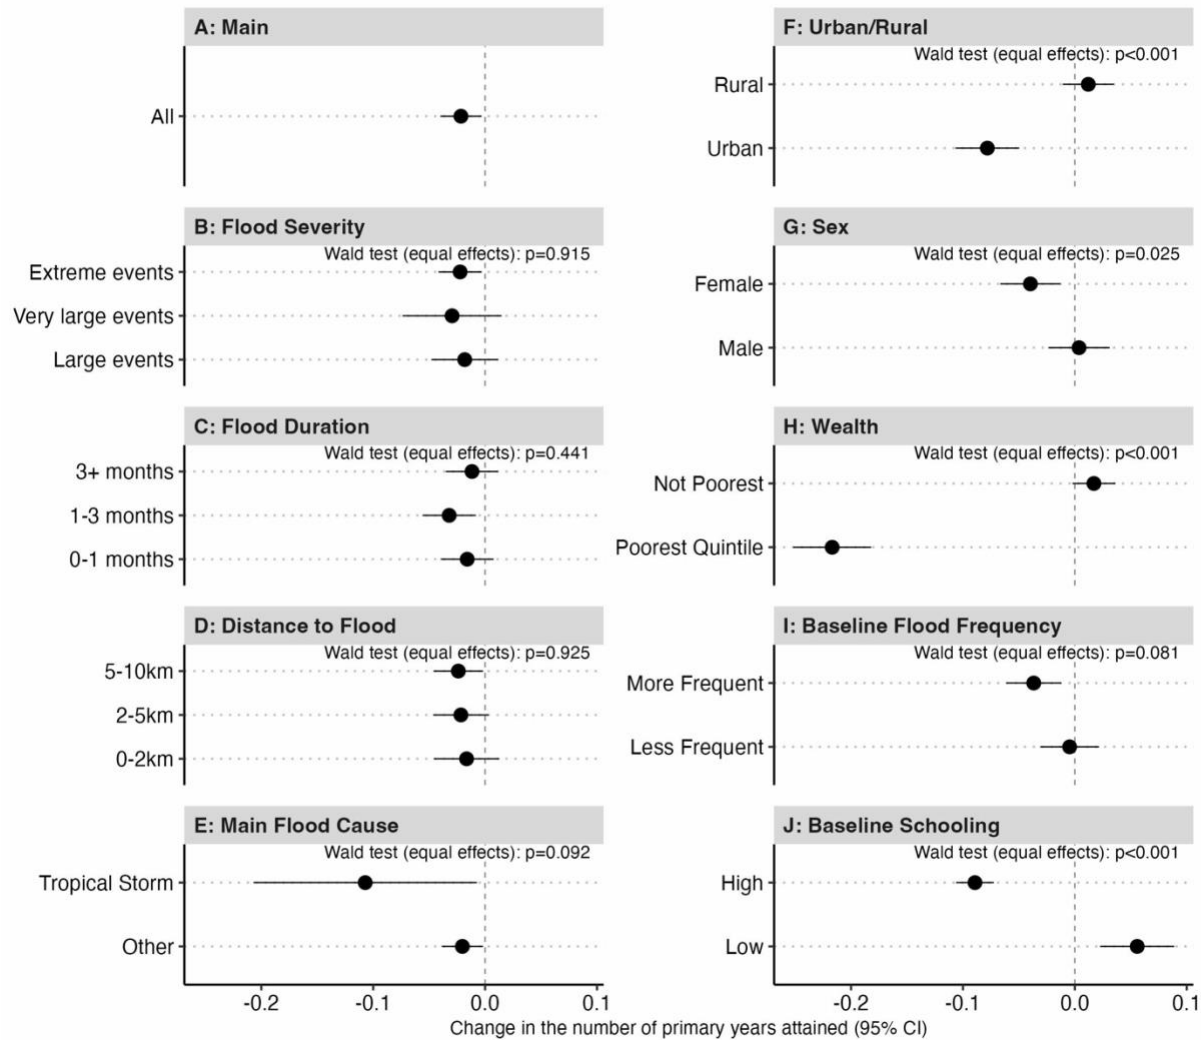

**Figure S6:** Effect of exposure to flooding at ages 5-6 on the number of years of primary schooling attained (max = 7 if primary school was reported as complete) across flood- and vulnerability-related factors. (A) Average effect across the entire sample. (B) Effect of floods classified as “large” (5–15-year recurrence interval), “very large” (15–100-year recurrence), and “extreme” (>100-year recurrence). (C) and (D) show the effects by flood duration and by distance from the cluster to the flood boundary, respectively. (E) Effect of floods associated with tropical storms versus other causes (e.g., monsoonal rain, snowmelt). (F) and (G) show the effects by rural/urban status and sex, respectively. (H) Effect among those living in the poorest wealth quintile (as defined in the DHS, by country). (I) Effect among clusters experiencing more than the median number of floods (median=5) versus fewer over the study period. (J) Effect among clusters with above- versus below-median rates of any formal education (median=0.96). Panels B–J report p-values from Wald tests assessing equality of effects across subgroups.

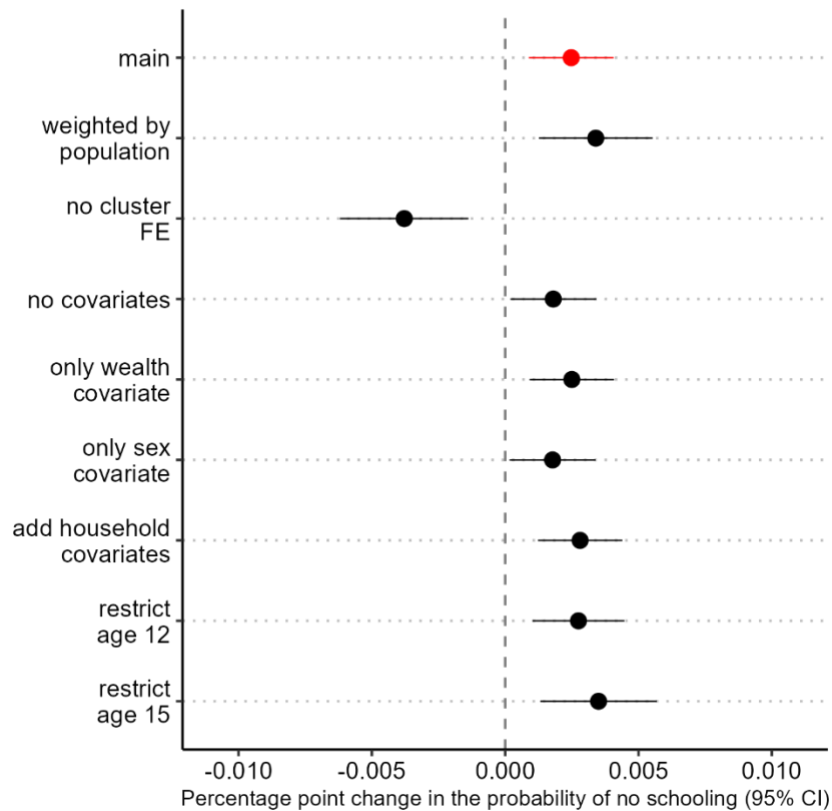

**Figure S7:** Results by model specification: “main” show the results from the primary analysis where each country is weighted by its sample size; “weighted by population” shows the results when each country is weighted in proportion to its population size, “no cluster FE” shows the effect when no cluster fixed effects are included in the model, “no covariates” show the effect when only cluster and time fixed effects are included in the model; “only wealth covariate” shows the effect when cluster fixed effects, time fixed effects and wealth quintile are in the model, “only sex covariate” shows the effect when cluster fixed effects, time fixed effects and sex are in the model, “add household covariates” shows the effect when cluster fixed effects, time fixed effects, wealth, sex, educational attainment of the household head, and sex of the household head are in the model, “restrict age 12” shows the results when the sample is restricted to those aged 12 and older, and “restrict age 15” shows the results when the sample is restricted to those aged 15 and older.
